# Supplementary material
Source: publisher site journal article supplement (https://www.dovepress.com/article/488928)
Supplement: Supplementary file 1 [file get_supplementary_file.php]

**Supplementary Materials**

**Title:** Resting heart rate mediates the association between circulating neutrophil count and arterial stiffness: the Kailuan study

[**Supplementary Table 1.** Counts and proportions of missing data in the baseline baPWV analysis. 2](#_Toc170341321)

[**Supplementary Table 2.** Counts and proportions of missing data in the baPWV progression analysis. 3](#_Toc170341322)

[**Supplementary Table 3.** Counts and proportions of missing data in the arterial stiffness risk analysis. 4](#_Toc170341323)

[**Supplementary Table 4.** Covariables assignment table for multivariable regression models. 5](#_Toc170341324)

[**Supplementary Table 5.** Baseline characteristics of participants for the baseline baPWV analysis. 6](#_Toc170341325)

[**Supplementary Table 6.** Baseline characteristics of participants for the arterial stiffness risk analysis. 7](#_Toc170341326)

[**Supplementary Table 7.** Stratified analyses of the association between neutrophil counts and baPWV progression. 8](#_Toc170341327)

[**Supplementary Table 8.** Sensitive analyses. 9](#_Toc170341328)

[**Supplementary Figure 1.** Collinearity analysis. 11](#_Toc170341329)

# **Supplementary Table 1.** Counts and proportions of missing data in the baseline baPWV analysis.

| **Variables** | **Missing (%)** |
| --- | --- |
| Neutrophil counts, 109/L | 0 |
| Age, years | 0 |
| Sex | 0 |
| Body mass index, kg/m2 | 813 (1.4%) |
| High-density lipoprotein cholesterol, mmol/L | 155 (0.27%) |
| Low-density lipoprotein cholesterol, mmol/L | 159 (0.28%) |
| Triglyceride, mmol/L | 155 (0.27%) |
| Estimated glomerular filtration rate, ml/min/1.73m2 | 168 (0.30%) |
| Smoking status | 1777 (3.1%) |
| Alcohol consumption | 2099 (3.7%) |
| Education level | 2606 (4.6%) |
| Physical activity | 2662 (4.7%) |
| Diabetes mellitus | 0 |
| Hypertension | 0 |
| Heart rate, beats/min | 364 (0.64%) |

# **Supplementary Table 2.** Counts and proportions of missing data in the baPWV progression analysis.

| **Variables** | **Missing (%)** |
| --- | --- |
| Neutrophil counts, 109/L | 0 |
| Age, years | 0 |
| Sex | 0 |
| Body mass index, kg/m2 | 343 (1.3%) |
| High-density lipoprotein cholesterol, mmol/L | 34 (0.12%) |
| Low-density lipoprotein cholesterol, mmol/L | 34 (0.12%) |
| Triglyceride, mmol/L | 33 (0.12%) |
| Estimated glomerular filtration rate, ml/min/1.73m2 | 34 (0.12%) |
| Smoking status | 562 (2.1%) |
| Alcohol consumption | 761 (2.8%) |
| Education level | 1283 (4.7%) |
| Physical activity | 864 (3.2%) |
| Diabetes mellitus | 0 |
| Hypertension | 0 |
| Heart rate, beats/min | 209 (0.77%) |

# **Supplementary Table 3.** Counts and proportions of missing data in the arterial stiffness risk analysis.

| **Variables** | **Missing (%)** |
| --- | --- |
| Neutrophil counts, 109/L | 0 |
| Age, years | 0 |
| Sex | 0 |
| Body mass index, kg/m2 | 330 (1.4%) |
| High-density lipoprotein cholesterol, mmol/L | 32 (0.14%) |
| Low-density lipoprotein cholesterol, mmol/L | 31 (0.13%) |
| Triglyceride, mmol/L | 31 (0.13%) |
| Estimated glomerular filtration rate, ml/min/1.73m2 | 32 (0.14%) |
| Smoking status | 479 (2.1%) |
| Alcohol consumption | 676 (2.9%) |
| Education level | 1210 (5.2%) |
| Physical activity | 769 (3.3%) |
| Diabetes mellitus | 0 |
| Hypertension | 0 |
| Heart rate, beats/min | 206 (0.88%) |

# **Supplementary Table 4.** Covariables assignment table for multivariable regression models.

| **Variables** | **Assignment** |
| --- | --- |
| Age | Continuous variable, years |
| Body mass index | Continuous variable, kg/m2 |
| High-density lipoprotein cholesterol | Continuous variable, mmol/L |
| Low-density lipoprotein cholesterol | Continuous variable, mmol/L |
| Triglyceride | Continuous variable, mmol/L |
| Estimated glomerular filtration rate | Continuous variable, ml/min/1.73m2 |
| Heart rate | Continuous variable, beats/min |
| Sex | 0: female, 1: male |
| Smoking status | 0: non-current smoker, 1: current smoker |
| Alcohol consumption | 0: non-current drinker, 1: current drinker |
| Education level | 0: middle school or below, 1: high school or above |
| Physical activity | 0: inactive, 1: active |
| Diabetes mellitus | 0: not, 1: yes |
| Hypertension | 0: not, 1: yes |

# **Supplementary Table 5.** Baseline characteristics of participants for the baseline baPWV analysis.

| **Characteristics** | **Neutrophil counts, 109/L** | | | | ***P* value** |
| --- | --- | --- | --- | --- | --- |
| **Quartile 1**  **(<2.91)** | **Quartile 2**  **(≥2.91,＜3.60)** | **Quartile 3**  **(≥3.60,＜4.40)** | **Quartile 4**  **(≥4.40)** |
| Participants | 14174 | 14838 | 12639 | 15109 |  |
| Age, years | 49.4 (13.8) | 49.6 (13.6) | 49.7 (13.5) | 50.0 (13.7) | <0.001 |
| Male, n (%) | 9469 (66.8) | 10942 (73.7) | 9794 (77.5) | 12180 (80.6) | <0.001 |
| BMI, kg/m2 | 24.3 (3.34) | 24.9 (3.37) | 25.3 (3.45) | 25.6 (3.60) | <0.001 |
| HDL-C, mmol/L | 1.44 (1.22, 1.73) | 1.38 (1.17, 1.65) | 1.36 (1.15, 1.62) | 1.33 (1.13, 1.59) | <0.001 |
| LDL-C, mmol/L | 2.67 (2.17, 3.21) | 2.74 (2.24, 3.29) | 2.75 (2.25, 3.30) | 2.78 (2.26, 3.30) | <0.001 |
| TG, mmol/L | 1.10 (0.77, 1.66) | 1.26 (0.87, 1.92) | 1.34 (0.92, 2.04) | 1.43 (0.98, 2.24) | <0.001 |
| eGFR, ml/min/1.73m2 | 91.1 (25.5) | 88.5 (25.2) | 87.7 (25.2) | 86.2 (25.6) | <0.001 |
| Current smoker, n (%) | 3399 (24.0) | 4266 (28.8) | 4172 (33.0) | 5899 (39.0) | <0.001 |
| Current drinker, n (%) | 5179 (36.5) | 5698 (38.4) | 5072 (40.1) | 6163 (40.8) | <0.001 |
| Active physical activity, n (%) | 2625 (18.5) | 2650 (17.9) | 2062 (16.3) | 2436 (16.1) | <0.001 |
| High school or above, n (%) | 5798 (40.9) | 5749 (38.7) | 4909 (38.8) | 5452 (36.1) | <0.001 |
| Diabetes, n (%) | 1756 (12.4) | 2286 (15.4) | 2121 (16.8) | 2889 (19.1) | <0.001 |
| Hypertension, n (%) | 3559 (25.4) | 4369 (29.4) | 3889 (30.8) | 5028 (33.3) | <0.001 |
| RHR, beats/min | 77.1 (17.5) | 77.8 (17.5) | 79.1 (18.1) | 81.2 (18.6) | <0.001 |
| baPWV, cm/s | 1485 (355) | 1520 (359) | 1540 (392) | 1570 (388) | <0.001 |

**Abbreviations**: BMI, body mass index; HDL-C, high-density lipoprotein cholesterol; LDL-C, low-density lipoprotein cholesterol; TG, triglyceride; eGFR, estimated glomerular filtration rate; RHR, resting heart rate; baPWV, brachial-ankle pulse wave velocity.

# **Supplementary Table 6** Baseline characteristics of participants for the arterial stiffness risk analysis.

| **Characteristics** | **Neutrophil counts, 109/L** | | | | ***P* value** |
| --- | --- | --- | --- | --- | --- |
| **Quartile 1**  **(< 2.90)** | **Quartile 2**  **(≥ 2.90,＜3.54)** | **Quartile 3**  **(≥ 3.54,＜4.30)** | **Quartile 4**  **(≥ 4.30)** |
| Participants | 5702 | 5936 | 5367 | 6258 |  |
| Age, years | 45.0 (11.2) | 45.6 (11.4) | 45.8 (11.2) | 46.2 (11.2) | <0.001 |
| Male, n (%) | 3278 (57.5) | 3836 (64.6) | 3697 (68.9) | 4557 (72.8) | <0.001 |
| BMI, kg/m2 | 24.0 (3.34) | 24.6 (3.35) | 25.1 (3.51) | 25.4 (3.67) | <0.001 |
| HDL-C, mmol/L | 1.47 (1.24, 1.78) | 1.42 (1.20, 1.71) | 1.38 (1.17, 1.66) | 1.36 (1.15, 1.62) | <0.001 |
| LDL-C, mmol/L | 2.57 (2.05, 3.10) | 2.60 (2.10, 3.13) | 2.62 (2.14, 3.16) | 2.64 (2.13, 3.18) | <0.001 |
| TG, mmol/L | 1.03 (0.72, 1.57) | 1.19 (0.81, 1.85) | 1.30 (0.88, 1.98) | 1.38 (0.94, 2.17) | <0.001 |
| eGFR, ml/min/1.73m2 | 96.8 (26.2) | 94.6 (26.9) | 93.8 (26.9) | 91.9 (27.5) | <0.001 |
| Current smoker, n (%) | 1219 (21.4) | 1600 (27.0) | 1611 (30.0) | 2405 (38.4) | <0.001 |
| Current drinker, n (%) | 2121 (37.2) | 2377 (40.0) | 2192 (40.8) | 2654 (42.4) | <0.001 |
| Active physical activity, n (%) | 1102 (19.3) | 1067 (18.0) | 928 (17.3) | 1054 (16.8) | <0.001 |
| High school or above, n (%) | 2856 (50.1) | 2825 (47.6) | 2521 (47.0) | 2713 (43.4) | <0.001 |
| Diabetes, n (%) | 439 (7.7) | 545 (9.2) | 594 (11.1) | 774 (12.4) | <0.001 |
| Hypertension, n (%) | 994 (17.4) | 1244 (21.0) | 1225 (22.8) | 1540 (24.6) | <0.001 |
| RHR, beats/min | 75.6 (16.5) | 76.0 (16.5) | 77.2 (17.0) | 79.3 (18.0) | <0.001 |
| baPWV, cm/s | 1346 (203) | 1361 (203) | 1378 (201) | 1392 (200) | <0.001 |

**Abbreviations** were as **Supplementary Table 5**.

# **Supplementary Table** **7** Stratified analyses of the association between neutrophil counts and baPWV progression.

| **Characteristics** | **Participants, n** | **Neutrophil counts (Per SD increase)** | | |
| --- | --- | --- | --- | --- |
| **β (95% confidence interval)** | ***P* value** | ***P* for interaction** |
| Age, years |  |  |  |  |
| ≥ 60 | 5193 | 8.70 (1.42, 16.0) | 0.019 | 0.277 |
| ＜60 | 22087 | 2.39 (0.89, 3.88) | 0.002 |
| Sex |  |  |  |  |
| male | 18469 | 3.36 (1.44, 5.28) | 0.001 | 0.625 |
| female | 8811 | 2.44 (-0.47, 5.35) | 0.101 |
| BMI, kg/m2 |  |  |  |  |
| ≥ 23 | 18955 | 2.98 (1.02, 4.94) | 0.003 | 0.636 |
| < 23 | 8325 | 3.17 (0.48, 5.86) | 0.021 |
| Diabetes |  |  |  |  |
| Yes | 3757 | 1.76 (-3.16, 6.68) | 0.482 | 0.367 |
| No | 23523 | 3.41 (1.76, 5.06) | <0.001 |
| Hypertension |  |  |  |  |
| Yes | 7508 | 3.40 (-0.15, 6.95) | 0.060 | 0.768 |
| No | 19772 | 2.90 (1.25, 4.56) | 0.001 |

**Notes**: All models were adjusted for age (continuous, except for age-stratified analysis), sex (male or female, except for sex-stratified analysis), BMI (continuous, except for BMI-stratified analysis), HDL-C (continuous), LDL-C (continuous), triglyceride (continuous), eGFR (continuous), current smoking (yes or no), current drinking (yes or no), education level (less than high school, or high school or above), physical activity (active or inactive), diabetes status (yes or no; except for diabetes-stratified analysis), hypertension status (yes or no; except for hypertension-stratified analysis ), and baseline baPWV (continuous).

**Abbreviations**: β indicates coefficients in regression analysis; SD, standard deviation; other abbreviations are as in **Supplementary Table 5**.

# **Supplementary Table 8** Sensitive analyses.

| **Neutrophil counts (109/L)** | **Baseline baPWV** | |  | **Progression of baPWV** | |  | **Arterial stiffness** | | |
| --- | --- | --- | --- | --- | --- | --- | --- | --- | --- |
| **β (95% CI)** | ***P* value** |  | **β (95% CI)** | ***P* value** |  | **HR (95% CI)** | ***P* value** |
| Sensitive analysis 1 |  |  |  |  |  |  |  |  |
| No. of participants |  |  |  | 25999 |  |  | 22158 |  |
| Q 1 | NA |  |  | Ref. |  |  | Ref. |  |
| Q 2 | NA | NA |  | 3.54 (0.49, 6.58) | 0.023 |  | 1.03 (0.93, 1.14) | 0.558 |
| Q 3 | NA | NA |  | 3.85 (0.71, 7.00) | 0.016 |  | 1.10 (0.99, 1.22) | 0.065 |
| Q 4 | NA | NA |  | 9.15 (5.95, 12.4) | < 0.001 |  | 1.22 (1.11, 1.35) | < 0.001 |
| *P* for trend | NA |  |  | < 0.001 |  |  | < 0.001 |  |
| Per SD increase | NA | NA |  | 2.48 (1.33, 3.63) | < 0.001 |  | 1.07 (1.04, 1.11) | < 0.001 |
| Sensitive analysis 2 |  |  |  |  |  |  |  |  |
| No. of participants | 55339 |  |  | 26649 |  |  | 22734 |  |
| Q 1 | Ref. |  |  | Ref. |  |  | Ref. |  |
| Q 2 | 15.4 (8.64, 22.2) | < 0.001 |  | 4.44 (0.02, 8.85) | 0.049 |  | 1.02 (0.92, 1.13) | 0.683 |
| Q 3 | 33.6 (26.5, 40.7) | < 0.001 |  | 5.46 (0.92, 10.0) | 0.019 |  | 1.10 (1.00, 1.22) | 0.062 |
| Q 4 | 56.0 (49.1, 62.9) | < 0.001 |  | 10.2 (5.60, 14.9) | < 0.001 |  | 1.16 (1.05, 1.28) | < 0.001 |
| *P* for trend | < 0.001 |  |  | < 0.001 |  |  | < 0.001 |  |
| Per SD increase | 13.5 (11.0, 15.9) | < 0.001 |  | 3.21 (1.59, 4.84) | < 0.001 |  | 1.07 (1.04, 1.11) | < 0.001 |
| Sensitive analysis 3 |  |  |  |  |  |  |  |  |
| No. of participants | 43708 |  |  | 21400 |  |  | 19512 |  |
| Q 1 | Ref. |  |  | Ref. |  |  | Ref. |  |
| Q 2 | 11.5 (4.65, 18.3) | 0.001 |  | 3.50 (-0.70, 7.70) | 0.102 |  | 1.06 (0.93, 1.20) | 0.376 |
| Q 3 | 32.2 (25.0, 39.3) | < 0.001 |  | 4.54 (0.19, 8.88) | 0.041 |  | 1.13 (0.99, 1.28) | 0.070 |
| Q 4 | 48.8 (41.9, 55.8) | < 0.001 |  | 9.67 (5.22, 14.1) | < 0.001 |  | 1.26 (1.11, 1.42) | < 0.001 |
| *P* for trend | < 0.001 |  |  | < 0.001 |  |  | < 0.001 |  |
| Per SD increase | 11.5 (9.12, 14.0) | < 0.001 |  | 2.65 (1.14, 4.17) | 0.001 |  | 1.07 (1.03, 1.12) | 0.001 |
| Sensitive analysis 4 |  |  |  |  |  |  |  |  |
| No. of participants | 51030 |  |  | 25139 |  |  | 21294 |  |
| Q 1 | Ref. |  |  | Ref. |  |  | Ref. |  |
| Q 2 | 16.7 (9.62, 23.8) | < 0.001 |  | 4.44 (-0.13, 9.00) | 0.057 |  | 1.04 (0.94, 1.15) | 0.461 |
| Q 3 | 33.1 (25.7, 40.5) | < 0.001 |  | 6.70 (2.00, 11.4) | 0.005 |  | 1.11 (1.00, 1.23) | 0.049 |
| Q 4 | 54.6 (47.5, 61.8) | < 0.001 |  | 11.5 (6.75, 16.3) | < 0.001 |  | 1.24 (1.12, 1.37) | < 0.001 |
| *P* for trend | < 0.001 |  |  | < 0.001 |  |  | < 0.001 |  |
| Per SD increase | 12.9 (10.3, 15.5) |  |  | 3.65 (1.97, 5.33) | < 0.001 |  | 1.07 (1.04, 1.11) | < 0.001 |

**Notes**: Sensitive analysis 1: excluded participants with a follow-up period shorter than one year;

Sensitive analysis 2: excluded participants with cancer at baseline;

Sensitive analysis 3: excluded participants with hypotensive, lipid-lowering, or hypoglycemic agents at baseline;

Sensitive analysis 4: excluded participants with missing covariate values and performed a complete case analysis.

All models were adjusted for age (continuous), sex (male or female), BMI (continuous), HDL-C (continuous), LDL-C (continuous), triglyceride (continuous), eGFR (continuous), current smoking (yes or no), current drinking (yes or no), education level (less than high school, or high school or above), physical activity (active or inactive), diabetes status (yes or no), hypertension status (yes or no), and baseline baPWV (continuous; only for progression of baPWV).

**Abbreviations**: β indicates coefficients in regression analysis; HR, hazard ratio; CI, confidential intervals; other abbreviations are as in **Supplementary Table 5**.


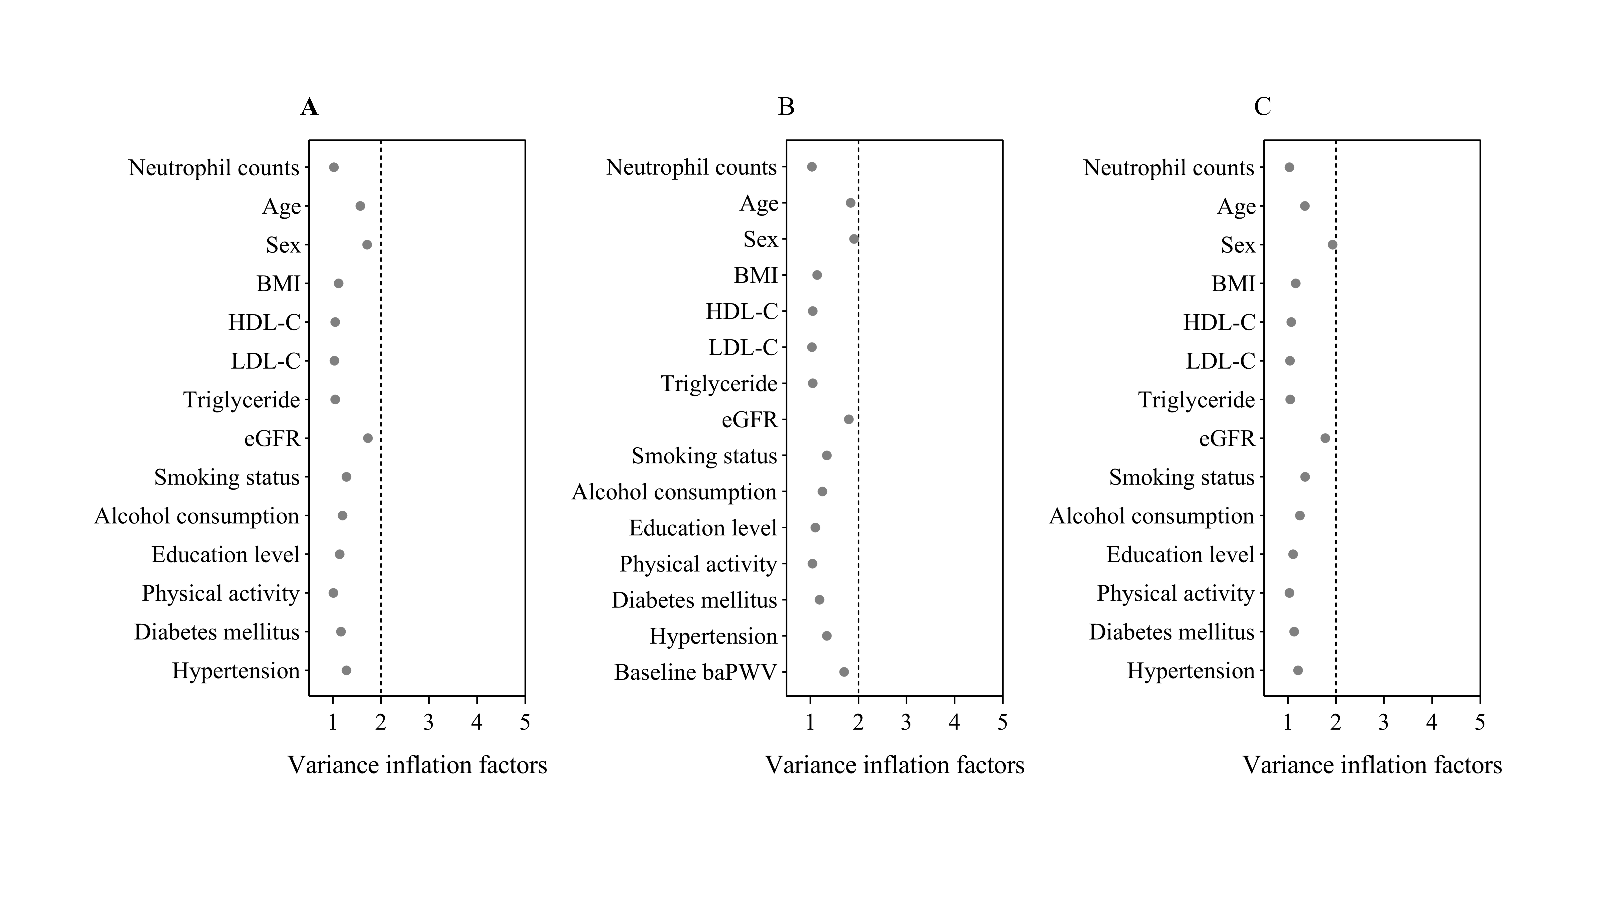


# **Supplementary Figure 1.** Collinearity analysis.

Variance inflation factors of the covariables in the baseline baPWV analysis (A), the baPWV progression analysis (B), and the arterial stiffness risk analysis (C).

**Abbreviations**: BMI, body mass index; HDL-C, high-density lipoprotein cholesterol; LDL-C, low-density lipoprotein cholesterol; eGFR, estimated glomerular filtration rate; baPWV, brachial-ankle pulse wave velocity.
